# Supplementary material
Source: PubMed Central journal article supplement (PMC10159268)
Supplement: ehp11139.smcontents.508.pdf [file ehp11139.smcontents.508.pdf]

**Note to readers with disabilities:** *EHP* strives to ensure that all journal content is accessible to all readers. However, some figures and Supplemental Material published in *EHP* articles may not conform to [508 standards](#) due to the complexity of the information being presented. If you need assistance accessing journal content, please contact [ehp508@niehs.nih.gov](mailto:ehp508@niehs.nih.gov). Our staff will work with you to assess and meet your accessibility needs within 3 working days.

### **Supplemental Material**

#### **Respiratory Effects of Traffic-Related Air Pollution: A Randomized, Crossover Analysis of Lung Function, Airway Metabolome, and Biomarkers of Airway Injury**

Xinlei Zhu, Qingli Zhang, Xihao Du, Yixuan Jiang, Yue Niu, Yongjie Wei, Yang Zhang, Steven N. Chillrud, Donghai Liang, Huichu Li, Renjie Chen, Haidong Kan, and Jing Cai

#### **Table of Contents**

##### **Questionnaires**

**Table S1.** The p-values for the difference of goodness-of-fit between the linear and non-linear models assessing exposure to traffic related air pollutants and outcome measures in a randomized crossover study, n=56 adults, Shanghai, China.

**Table S2.** Spearman correlation coefficients among traffic related air pollutants measured in a randomized crossover study, n=56 adults.

**Table S3.** Respiratory symptom score (mean  $\pm$  SD) before and after each exposure session (Road and Park) among 56 young adults participating in a randomized crossover study in China.

**Table S4.** P values for associations shown in Figure 1 for identified metabolic pathways associated with TRAP and individual air pollutants based on the untargeted metabolome wide-association study (MWAS) conducted for exhaled breath condensate (EBC) metabolomics in a randomized crossover trial in China (n=56 adults).

**Figure S1.** Flowchart of participants' recruitment and selection for a randomized crossover study on exposure to traffic related air pollution.

**Figure S2.** Time series of 24-hour sampling for *NanoTracer* (UFP) (5-minute interval), *MicroPEM* (PM<sub>2.5</sub>) (1-minute interval), *MicroAeth* (BC) (5-minute interval) and *PEK Lite* (NO<sub>2</sub> and CO) (1-minute interval) during the side-by-side tests before the trial.

**Figure S3.** Time series of 24-hour sampling for *NanoTracer* (UFP) (5-minute interval), *MicroPEM* (PM<sub>2.5</sub>) (1-minute interval), *MicroAeth* (BC) (5-minute interval) and *PEK Lite* (NO<sub>2</sub> and CO) (1-minute interval) during the side-by-side tests at the middle of the trial.

**Figure S4.** Time series of 24-hour sampling for *NanoTracer* (UFP) (5-minute interval), *MicroPEM* (PM<sub>2.5</sub>) (1-minute interval), *MicroAeth* (BC) (5-minute interval) and *PEK Lite* (NO<sub>2</sub> and CO) (1-minute interval) during the side-by-side tests at the end of the trial.
